# Supplementary material for: The effects of Lu3+, Gd3+ and Ga3+ substitution on the photoluminescence of Y2.95−x−yLuxGdyAlzGa5−zO12:0.05Ce3+ phosphors for high-power white AC-LEDs
Source: Royal Society of Chemistry journal article supplement (doi:10.1039/d3dt04351g), 2024-01-01
Supplement: d3dt04351g1.pdf [file d3dt04351g1.pdf]

ARTICLE

**Supplementary Information**

The band gap of the host is crucial to the luminescent properties of the phosphor. Fig. S1a displays the reflectance spectra of  $Y_{0.95}LuGdAl_{5-z}Ga_2O_{12}:0.05Ce^{3+}$ , ( $z=1-4$ , sintered at 1600 °C for 6 h) ranging from 300 to 700 nm. The band gap energy ( $E_g$ ) of  $Y_{0.95}LuGdAl_{5-z}Ga_2O_{12}:0.05Ce^{3+}$  was determined by extrapolating the Kubelka-Munk absorption function:

$$F(R) = (1 - R)^2 / 2R \quad (1)$$

$$[F(R)h\nu]^2 = C (h\nu - E_g) \quad (2)$$

where  $R$  represents the diffuse reflection coefficient;  $h\nu$  denotes the photon energy, and  $C$  is the proportionality constant. As depicted in the inset of Fig. S1b, the extrapolating of the linear portion of the  $[F(R)h\nu]^2 - h\nu$  curve yields an  $E_g$  value of 4.63 eV for the  $Y_{0.95}LuGdAl_4GaO_{12}:0.05Ce^{3+}$  ( $z=1$ ), 4.25 eV for  $Y_{0.95}LuGdAlGa_4O_{12}:0.05Ce^{3+}$  ( $z = 4$ ).

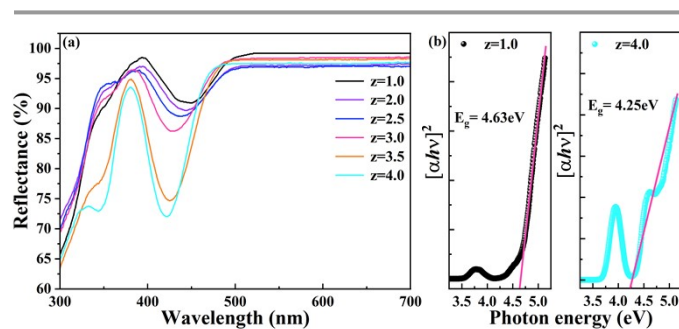

Fig. S1 (a) Diffuse reflection spectra of  $Y_{0.95}LuGdAl_{5-z}Ga_2O_{12}:0.05Ce^{3+}$  ( $z=1-4$ ). (b) The experimental  $E_g$  of  $Y_{0.95}LuGdAl_4GaO_{12}:0.05Ce^{3+}$  ( $z=1$ ) and  $Y_{0.95}LuGdAlGa_4O_{12}:0.05Ce^{3+}$  ( $z = 4$ ).
